CORRECTION

# Correction: Human and Murine Clonal CD8+ T Cell Expansions Arise during Tuberculosis Because of TCR Selection

The *PLOS Pathogens* Staff

## Notice of Republication

This article was republished on August 12, 2015, to correct typographical errors throughout the text, in the Abstract, and in Table 2 that were introduced during the typesetting process. The errors consisted of un-subscripted characters and omitted Greek symbols. The publisher apologizes for the errors. Please download this article again to view the correct version. The originally published, uncorrected article and the republished, corrected article are provided here for reference.

## Supporting Information

**S1 File. Originally published, uncorrected article.**  
(PDF)

**S2 File. Republished, corrected article.**  
(PDF)

## Reference

1. Nunes-Alves C, Booty MG, Carpenter SM, Rothchild AC, Martin CJ, Desjardins D, et al. (2015) Human and Murine Clonal CD8+ T Cell Expansions Arise during Tuberculosis Because of TCR Selection. *PLoS Pathog* 11(5): e1004849. doi: [10.1371/journal.ppat.1004849](https://doi.org/10.1371/journal.ppat.1004849) PMID: [25945999](https://pubmed.ncbi.nlm.nih.gov/25945999/)

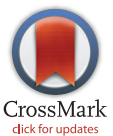

## OPEN ACCESS

**Citation:** The *PLOS Pathogens* Staff (2015) Correction: Human and Murine Clonal CD8+ T Cell Expansions Arise during Tuberculosis Because of TCR Selection. *PLoS Pathog* 11(9): e1005144. doi:10.1371/journal.ppat.1005144

**Published:** September 17, 2015

**Copyright:** © 2015 The PLOS Pathogens Staff. This is an open access article distributed under the terms of the [Creative Commons Attribution License](https://creativecommons.org/licenses/by/4.0/), which permits unrestricted use, distribution, and reproduction in any medium, provided the original author and source are credited.
